# Supplementary material for: Exploring the breadth of medicine: 8-year outcomes of a brief clinical summer immersion for premedical students
Source: PubMed Central journal article supplement (PMC11606093; doi:10.1186/s12909-024-06301-5), 2024-11-28
Supplement: 12909_2024_6301_MOESM1_ESM.pdf [file 12909_2024_6301_MOESM1_ESM.pdf]

# Stanford CSI Follow-up Learner Survey

---

Start of Block: Default Question Block

Intro Dear Stanford CSI Alumni,

We hope that you and your families are healthy and thriving in these challenging times.

Time has flown! Seven years ago, we started the Stanford Clinical Summer Internship, and have met the most amazing students – you! Now, we would like to understand what you are doing, and how Stanford-CSI was useful for you.

We would be very grateful if you could take 5 minutes to complete this anonymous survey. We will use your responses to revisit and improve our program.

Warmly,  
Drs. Khemani and Weinlander and the Stanford-CSI team

---

Page Break

Q1 In what year did you participate in the Stanford CSI Program?

- 2016 (coded as 1)
- 2017 (2)
- 2018 (3)
- 2019 (4)
- 2020 (5)
- 2021 (6)

---

*Display This Question:*

*If In what year did you participate in the Stanford CSI Program? = 2020  
Or In what year did you participate in the Stanford CSI Program? = 2021*

Q19 Stanford's CSI is usually held in person, and we would like to understand how the shift to virtual education affected your experience. How strongly do you agree or disagree with the following statements?

Participating in the Stanford CSI program virtually....

|                                                                     | Strongly Disagree (1) | Disagree (2)          | Neutral (3)           | Agree (4)             | Strongly Agree (5)    |
|---------------------------------------------------------------------|-----------------------|-----------------------|-----------------------|-----------------------|-----------------------|
| Saved me time (coded as 1)                                          | <input type="radio"/> | <input type="radio"/> | <input type="radio"/> | <input type="radio"/> | <input type="radio"/> |
| Let me connect with the instructors/faculty in a meaningful way (2) | <input type="radio"/> | <input type="radio"/> | <input type="radio"/> | <input type="radio"/> | <input type="radio"/> |
| Let me connect with my classmates in a meaningful way (3)           | <input type="radio"/> | <input type="radio"/> | <input type="radio"/> | <input type="radio"/> | <input type="radio"/> |

Q2 What academic year did you enter following your participation in Stanford CSI?

- High School – Sophomore (coded as 1)
  - High School – Junior (2)
  - High School – Senior (3)
  - College – Freshman (4)
  - College – Sophomore (5)
  - College – Junior (6)
  - College- Senior (7)
  - Other (8) \_\_\_\_\_
- 

Q3 With which gender do you identify? (select one)

- Male (coded as 1)
  - Female (2)
  - Non-binary (3)
  - Other: (4) \_\_\_\_\_
  - Prefer not to say (5)
-

Q4 With which race/ethnicity do you identify? (Select all that apply)

- Hispanic/Latinx (coded as 1)
  - Mexican (2)
  - Puerto Rican (3)
  - Caucasian or Non-Hispanic white (4)
  - African American or Non-Hispanic black (5)
  - Middle Eastern (6)
  - Chinese (8)
  - Asian Indian (9)
  - Filipino (10)
  - Vietnamese (11)
  - Japanese (12)
  - Korean (14)
  - Native American (17)
  - Native Hawaiian (20)
  - Other Pacific Islander (16) \_\_\_\_\_
  - Other Asian (15) \_\_\_\_\_
  - Other: (18) \_\_\_\_\_
  - Prefer not to answer (19)
- 

Q5 At the time of the program, did you request financial assistance?

- Yes (coded as 1)
  - No (2)
- 

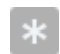

Q6 Why did you attend the Stanford CSI program? (select your top 2)

- To consider a career in the health professions (medicine, nursing, PA, pharmacy, etc) (coded as 1)
  - To consider a career in healthcare research (2)
  - To make connections with like-minded students (3)
  - To make connections with Stanford faculty as potential mentors (4)
  - To strengthen my resume (5)
  - To learn about specific specialties (6)
  - To learn about advances in science (7)
  - Other: (8) \_\_\_\_\_
- 

Page Break

Q7 What are you doing now? (select all that apply)

- High School (coded as 1)
  - College (2)
  - Gap year/time (3)
  - Working (4)
  - Master's Program (5)
  - PhD Program (6)
  - Medical School (7)
  - Nursing School (8)
  - Nurse Practitioner/Physician Assistant School (9)
  - Other: (10) \_\_\_\_\_
-

Q8 How strongly do you disagree or agree with the following statements?

“Participation in CSI...

|                                                                            | Strongly Disagree (1) | Disagree (2)          | Neutral (3)           | Agree (4)             | Strongly Agree (6)    |
|----------------------------------------------------------------------------|-----------------------|-----------------------|-----------------------|-----------------------|-----------------------|
| Broadened my perspective about healthcare (coded as 1)                     | <input type="radio"/> | <input type="radio"/> | <input type="radio"/> | <input type="radio"/> | <input type="radio"/> |
| Contributed to an increased interest in a career in healthcare (2)         | <input type="radio"/> | <input type="radio"/> | <input type="radio"/> | <input type="radio"/> | <input type="radio"/> |
| Contributed to an increased interest in a career in specialty medicine (3) | <input type="radio"/> | <input type="radio"/> | <input type="radio"/> | <input type="radio"/> | <input type="radio"/> |
| Contributed to an increased interest in a career in primary care (4)       | <input type="radio"/> | <input type="radio"/> | <input type="radio"/> | <input type="radio"/> | <input type="radio"/> |
| Contributed to an increased interest in a career in research (5)           | <input type="radio"/> | <input type="radio"/> | <input type="radio"/> | <input type="radio"/> | <input type="radio"/> |
| Clarified what a life/career in medicine would be like (6)                 | <input type="radio"/> | <input type="radio"/> | <input type="radio"/> | <input type="radio"/> | <input type="radio"/> |
| Gave me valuable clinical skills (7)                                       | <input type="radio"/> | <input type="radio"/> | <input type="radio"/> | <input type="radio"/> | <input type="radio"/> |
| Reinforced my career choice (8)                                            | <input type="radio"/> | <input type="radio"/> | <input type="radio"/> | <input type="radio"/> | <input type="radio"/> |
| Changed my career choice (9)                                               | <input type="radio"/> | <input type="radio"/> | <input type="radio"/> | <input type="radio"/> | <input type="radio"/> |
| Improved my professional network (10)                                      | <input type="radio"/> | <input type="radio"/> | <input type="radio"/> | <input type="radio"/> | <input type="radio"/> |
| Improved my resume (11)                                                    | <input type="radio"/> | <input type="radio"/> | <input type="radio"/> | <input type="radio"/> | <input type="radio"/> |
| Led directly to new opportunities (12)                                     | <input type="radio"/> | <input type="radio"/> | <input type="radio"/> | <input type="radio"/> | <input type="radio"/> |
| Led to new friendships (13)                                                | <input type="radio"/> | <input type="radio"/> | <input type="radio"/> | <input type="radio"/> | <input type="radio"/> |
| Was a good use of my time (14)                                             | <input type="radio"/> | <input type="radio"/> | <input type="radio"/> | <input type="radio"/> | <input type="radio"/> |
| Was a good use of my resources (15)                                        | <input type="radio"/> | <input type="radio"/> | <input type="radio"/> | <input type="radio"/> | <input type="radio"/> |

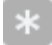

Q9 How did Stanford CSI participation impact your career insights and development, and your understanding of the field of medicine?

---

---

---

---

---

End of Block: Default Question Block

---

Start of Block: Final Thoughts

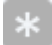

Q11 Any final thoughts or reflections about CSI? Experiences that you liked? Things to change?

---

---

---

---

---

End of Block: Final Thoughts

---
