# Supplementary material for: Exploring the breadth of medicine: 8-year outcomes of a brief clinical summer immersion for premedical students
Source: PubMed Central journal article supplement (PMC11606093; doi:10.1186/s12909-024-06301-5), 2024-11-28
Supplement: 12909_2024_6301_MOESM2_ESM.pdf [file 12909_2024_6301_MOESM2_ESM.pdf]

Supplemental Table 2. Stanford Clinical Summer Internship participant demographics (survey respondents, 2016-2023).

| <b>Expression</b>                     | <b>Total<br/>n=172<br/>n(%)</b> | <b>High School<br/>Participants<br/>n=132<br/>n(%)</b> | <b>College/<br/>Post-High School<br/>Participants<br/>n=40<br/>n(%)</b> |
|---------------------------------------|---------------------------------|--------------------------------------------------------|-------------------------------------------------------------------------|
| <b>Self-Identified Gender</b>         |                                 |                                                        |                                                                         |
| Female                                | 114<br>(66%)                    | 83<br>(63%)                                            | 31<br>(78%)                                                             |
| Male                                  | 54<br>(31%)                     | 46<br>(35%)                                            | 8.0<br>(20%)                                                            |
| Non-binary                            | 2.0<br>(1.2%)                   | 1.0<br>(0.8%)                                          | 1.0<br>(2.5%)                                                           |
| Other/Prefer not to say               | 2.0<br>(1.2%)                   | 2.0<br>(1.5%)                                          | 0.0<br>(0.0%)                                                           |
| <b>Self-Identified Race/Ethnicity</b> |                                 |                                                        |                                                                         |
| Caucasian/Non-Hispanic white          | 60<br>(35%)                     | 45<br>(34%)                                            | 15<br>(37%)                                                             |
| Chinese                               | 34<br>(22%)                     | 26<br>(23%)                                            | 8.0<br>(21%)                                                            |
| Asian Indian                          | 28<br>(18%)                     | 23<br>(20%)                                            | 5.0<br>(13%)                                                            |
| Hispanic/Latinx*                      | 18<br>(11%)                     | 12<br>(9.1%)                                           | 6.0<br>(15%)                                                            |
| Middle Eastern                        | 7.0<br>(4.1%)                   | 4.0<br>(3.0%)                                          | 3.0<br>(7.5%)                                                           |
| Korean                                | 10<br>(5.8%)                    | 10<br>(7.6%)                                           | 0.0<br>(0.0%)                                                           |
| African American/ Non-Hispanic black  | 7.0<br>(4.1%)                   | 3.0<br>(2.3%)                                          | 4.0<br>(10%)                                                            |
| Filipino                              | 4.0<br>(2.3%)                   | 4.0<br>(3.0%)                                          | 0.0<br>(0.0%)                                                           |
| Vietnamese                            | 4.0<br>(2.3%)                   | 2.0<br>(1.5%)                                          | 2.0<br>(5.0%)                                                           |
| Japanese                              | 2.0<br>(1.2%)                   | 2.0<br>(1.5%)                                          | 0.0<br>(0.0%)                                                           |
| Native American                       | 1.0<br>(0.6%)                   | 0.0<br>(0.0%)                                          | 1.0<br>(2.5%)                                                           |
| Other/Prefer not to say               | 11<br>(6.0%)                    | 6.0<br>(5.0%)                                          | 5<br>(13%)                                                              |

\*Hispanic/Latinx includes Mexican and Puerto Rican.
