# Supplementary material for: Exploring the breadth of medicine: 8-year outcomes of a brief clinical summer immersion for premedical students
Source: PubMed Central journal article supplement (PMC11606093; doi:10.1186/s12909-024-06301-5), 2024-11-28
Supplement: 12909_2024_6301_MOESM3_ESM.pdf [file 12909_2024_6301_MOESM3_ESM.pdf]

Supplemental Table 3. Characteristics of brief United States clinical programs for premedical students (1-3 week durations).

| <b>Institution</b>                  | <b>Program</b>                          | <b>Duration</b> | <b>Learner Level</b>                                          | <b>Program Focus</b>                                                                                                                                               | <b>Featured Attributes</b>                                                          | <b>Website</b>                               |
|-------------------------------------|-----------------------------------------|-----------------|---------------------------------------------------------------|--------------------------------------------------------------------------------------------------------------------------------------------------------------------|-------------------------------------------------------------------------------------|----------------------------------------------|
| University of Connecticut           | Pre-Med: Explore the Medical Field      | 1 week          | 15+ yo                                                        | Focus on Overview of cardiology and gastroenterology. Insights into the daily life of a physician, to help students decide if medicine is a potential career path. | Pre-med academic advising.<br>Professional Networking.<br>Clinical skills training. | <a href="#">UCONN pre-med</a>                |
| Highland Hospital in Oakland, CA    | Medical Immersion Summer Academy (MISA) | 1 week          | Rising 10 <sup>th</sup> , 11 <sup>th</sup> , 12 <sup>th</sup> | Exposure to broad range of healthcare and clinical experiences                                                                                                     | Clinical skills training.<br>CPR certification.<br>Professional Networking.         | <a href="#">MISA</a>                         |
| Tufts University School of Medicine | Mini-Med School                         | 1 week          | Rising 11 <sup>th</sup> , 12 <sup>th</sup> , Undergrads       | Exposure to broad range of clinical experiences and career options in medicine                                                                                     | Clinical skills training.<br>Anatomy lab                                            | <a href="#">Tufts mini-med school 1 week</a> |

| <b>Institution</b>                        | <b>Program</b>                                     | <b>Duration</b> | <b>Learner Level</b>                                | <b>Program Focus</b>                                                                                                                   | <b>Featured Attributes</b>                                                                                                                                    | <b>Website</b>                            |
|-------------------------------------------|----------------------------------------------------|-----------------|-----------------------------------------------------|----------------------------------------------------------------------------------------------------------------------------------------|---------------------------------------------------------------------------------------------------------------------------------------------------------------|-------------------------------------------|
| University of Colorado School of Medicine | Wilderness and Emergency Medicine                  | 1.5 weeks       | Undergrads, gap year students, and recent graduates | Emphasis on emergency/wilderness medicine and global health. Provide students with info and tools to help medical school applications. | EMT certificate<br>Clinical skills training (EMT)<br>Professional Networking.                                                                                 | <a href="#">Wilderness and Enviro Med</a> |
| Stanford University School of Medicine    | Stanford Anesthesia Summer Institute (SASI)        | 1 or 2 weeks    | 11th, 12th Undergrads (must be 16+)                 | Anesthesia, perioperative care,<br><br>Capstone                                                                                        | Optional virtual Capstone project.                                                                                                                            | <a href="#">SASI</a>                      |
| Stanford University School of Medicine    | Stanford Clinical Summer Internship (Stanford-CSI) | 2 weeks         | 11th, 12th Undergrads (must be 16+)                 | Broad intro to medicine and career opportunities.<br>Shadowing opportunities.                                                          | Lectures.<br>Clinical skills,<br>Anatomy Lab.<br>Physician Shadowing.<br>Simulation (peds trauma/childbirth)<br>Capstone project.<br>Professional networking. | <a href="#">Stanford CSI</a>              |

| <b>Institution</b>                     | <b>Program</b>                                            | <b>Duration</b> | <b>Learner Level</b>                                    | <b>Program Focus</b>                                                                                                              | <b>Featured Attributes</b>                                                   | <b>Website</b>                        |
|----------------------------------------|-----------------------------------------------------------|-----------------|---------------------------------------------------------|-----------------------------------------------------------------------------------------------------------------------------------|------------------------------------------------------------------------------|---------------------------------------|
| Stanford University School of Medicine | Stanford Cardiothoracic Surgical Skills Summer Internship | 2 weeks         | 16+ yo                                                  | Provide knowledge and exposure to basic cardiothoracic surgery and technical skills                                               | Lectures.<br>Clinical skills training in CT surgery.<br><i>Virtual only.</i> | <a href="#">Stanford CSS</a>          |
| Tufts University School of Medicine    | Mini-Med School                                           | 2 weeks         | Rising 11 <sup>th</sup> , 12 <sup>th</sup> + Undergrads | Experience in studying the medical sciences, focused on infectious disease and immunology.<br>Explore career options in medicine. | Lectures.<br>Anatomy lab .<br>Clinical skills training.<br>Capstone project. | <a href="#">Tufts mini-med school</a> |
| University of California-Irvine        | Summer Surgical Program                                   | 2 weeks         | 16+ yo                                                  | Hands-on experience in surgery and medicine                                                                                       | Surgical shadowing<br>CPR & BLS certification<br>Anatomy lab                 | <a href="#">UC Irvine HS Program</a>  |

| <b>Institution</b>       | <b>Program</b>                                                      | <b>Duration</b> | <b>Learner Level</b>                                                            | <b>Program Focus</b>                                                                                               | <b>Featured Attributes</b>                                                           | <b>Website</b>                |
|--------------------------|---------------------------------------------------------------------|-----------------|---------------------------------------------------------------------------------|--------------------------------------------------------------------------------------------------------------------|--------------------------------------------------------------------------------------|-------------------------------|
| Boston University        | AIM: Intro to Medicine                                              | 3 weeks         | 11 <sup>th</sup> , 12 <sup>th</sup>                                             | Broad intro to medicine career opportunities. Science coursework and experiential activities                       | Simulation labs<br>Clinical Skills training<br>Anatomy lab                           | <a href="#">AIM BU</a>        |
| University of California | Program for Investigation and Training in Careers in Health (PITCH) | 3 weeks         | Rising 9 <sup>th</sup> , 10 <sup>th</sup> , 11 <sup>th</sup> , 12 <sup>th</sup> | Catered for students with underrepresented backgrounds. Emphasis on dentistry, pharmacology, medicine, and nursing | Grad student mentoring.<br>Professional Networking.<br>Lectures<br>Capstone project. | <a href="#">UCSF PITCH</a>    |
| Georgetown University    | Medical Academy                                                     | 3 weeks         | Rising 9 <sup>th</sup> , 10 <sup>th</sup> , 11 <sup>th</sup> , 12 <sup>th</sup> | 3 tracks: anatomy & physiology, neuroscience, or emergency med                                                     | Case studies & labs.<br>Capstone project.                                            | <a href="#">Georgetown MA</a> |

| Institution              | Program                        | Duration | Learner Level                              | Program Focus                                                               | Featured Attributes                                                                                                                                                     | Website              |
|--------------------------|--------------------------------|----------|--------------------------------------------|-----------------------------------------------------------------------------|-------------------------------------------------------------------------------------------------------------------------------------------------------------------------|----------------------|
| University of Pittsburgh | Health Career Scholars Academy | 4 weeks  | Rising 11 <sup>th</sup> , 12 <sup>th</sup> | Offers health-relevant concentration courses for students to study in depth | Lecture courses offered vary by year (ie. health care for the chronically ill, family and child health, behavioral health, geriatrics, global health and public health) | <a href="#">HCSA</a> |
